# Supplementary material for: Fear extinction requires Arc/Arg3.1 expression in the basolateral amygdala
Source: PubMed Central journal article supplement (PMC4022082; doi:10.1186/1756-6606-7-30), 2014-04-23

**A**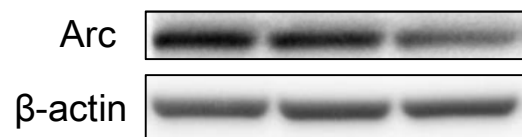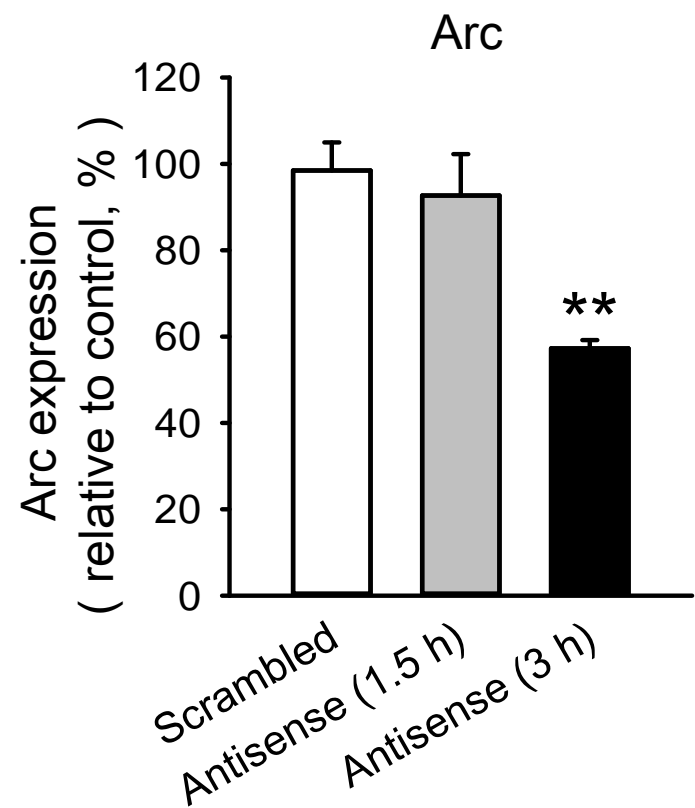**B**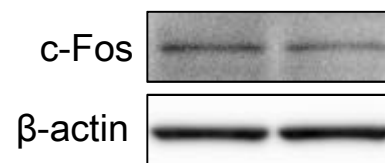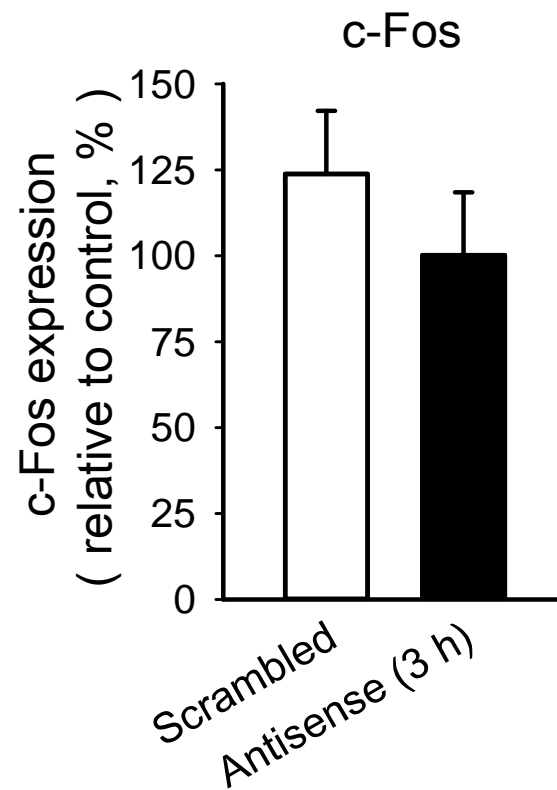**C**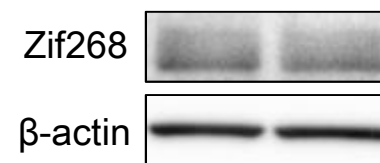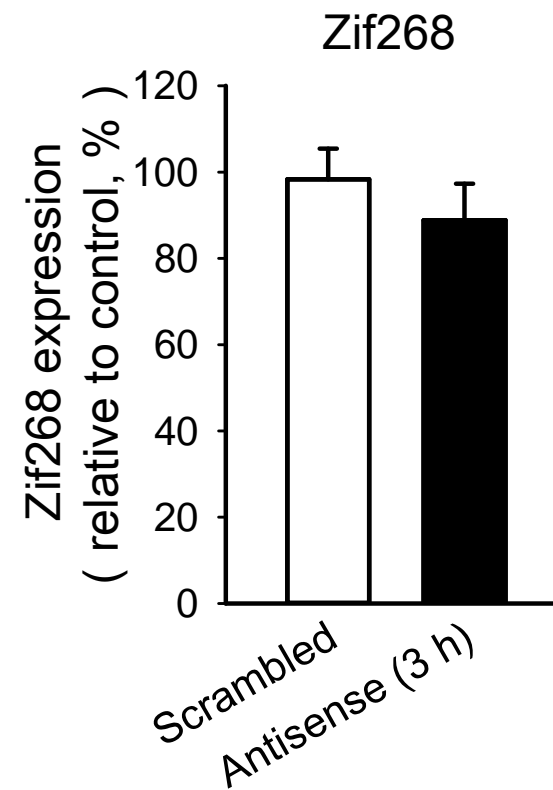

Supplement: 1756-6606-7-30-S1.pdf [file 1756-6606-7-30-S1.pdf]
